# Supplementary material
Source: publisher figshare collection journal article supplement (https://frontiersin.figshare.com/ndownloader/files/21759093)
Supplement: Supplementary file 1 [file 21759093]

Supplementary Material

**Contents:**

**Tables S1 to S4**

**Table S1.** The effect of the pesticide alone on plant traits evaluated at the onset of the experiment. Sample size (*N*) and mean ± S.D. per trait per pesticide treatment is shown. For statistical analyses, linear mixed models with ‘Treatment’ and ‘T✕F’ as fixed factors, and ‘Family’ as random factor were performed. For bee visitation, the random factor was ‘Plot’. *P*-values in bold indicate a significant effect in the models. For the random factor ‘Family’, the variance component is provided instead of the *F*-value. All trait means are expressed in mm if not otherwise indicated. Scent variables are in units of pg/flower/L, and underlined for units of pg/flower/6.667 min. For scent compounds, the target ion and the ions for identifying spectra (Q1, Q2, and Q3 below the sample size data) are provided.

| Trait | *N* | Plants without pesticide | Plants with pesticide | Source | df | *F* or variance component | *P* |
| --- | --- | --- | --- | --- | --- | --- | --- |
| Petal width | 69 | 4.85 ± 0.68 | 4.89 ± 0.69 | Treatment (T) | 1 | 0.7352 | 0.3982 |
|  |  |  |  | Family (F) | 20 | 0.056915 | 0.3619 |
|  |  |  |  | T✕F | 20 | 1.1514 | 0.3568 |
| Petal length | 69 | 6.73 ± 0.65 | 6.93 ± 0.63 | Treatment (T) | 1 | 2.4296 | 0.1295 |
|  |  |  |  | Family (F) | 20 | 0.064723 | 0.3073 |
|  |  |  |  | T✕F | 20 | 0.5119 | 0.9392 |
| Pistil length | 69 | 10.06 ± 1.09 | 10.27 ± 0.86 | Treatment (T) | 1 | 2.5249 | 0.1231 |
|  |  |  |  | Family (F) | 20 | 0.106316 | 0.4518 |
|  |  |  |  | T✕F | 20 | 0.8617 | 0.6298 |
| Long stamen length | 69 | 8.67 ± 0.62 | 8.87 ± 0.67 | Treatment (T) | 1 | 2.0515 | 0.1623 |
|  |  |  |  | Family (F) | 20 | 0.102383 | 0.1193 |
|  |  |  |  | T✕F | 20 | 0.7499 | 0.7463 |
| Short stamen length | 69 | 5.22 ± 0.51 | 5.46 ± 0.44 | **Treatment (T)** | **1** | **8.0001** | **0.024** |
|  |  |  |  | Family (F) | 20 | 0.084656 | 0.076 |
|  |  |  |  | T✕F | 20 | 1.1403 | 0.3671 |
| Nectar volume (µl) | 69 | 6.68 ± 4.35 | 7.19 ± 5.46 | Treatment (T) | 1 | 0.4139 | 0.5248 |
|  |  |  |  | Family (F) | 20 | 3.836606 | 0.305 |
|  |  |  |  | T✕F | 20 | 0.4752 | 0.957 |
| No. of inflorescences | 69 | 5.97 ± 1.07 | 6.18 ± 0.76 | Treatment (T) | 1 | 1.6834 | 0.2055 |
|  |  |  |  | Family (F) | 20 | 0.1763 | 0.1622 |
|  |  |  |  | T✕F | 20 | 1.8055 | 0.0767 |
| No. of flowers | 69 | 120.25 ± 39.02 | 128.35 ± 42.34 | Treatment (T) | 1 | 1.766 | 0.194 |
|  |  |  |  | Family (F) | 20 | 80.217 | 0.674 |
|  |  |  |  | T✕F | 20 | 1.594 | 0.125 |
| Plant height (cm) | 63 | 100.8 ± 13.5 | 100.22 ± 15.97 | Treatment (T) | 1 | 0.0514 | 0.8228 |
|  |  |  |  | Family (F) | 20 | 25.26478 | 0.6049 |
|  |  |  |  | T✕F | 20 | 0.3455 | 0.9899 |
| Stem diameter at base | 63 | 8.77 ± 0.84 | 8.51 ± 0.83 | Treatment (T) | 1 | 2.8222 | 0.1045 |
|  |  |  |  | Family (F) | 20 | 0.6359 | 0.0777 |
|  |  |  |  | T✕F | 20 | 1.3009 | 0.2587 |
| Longest leaf length (cm) | 63 | 29.97 ± 3.66 | 30.13 ± 3.61 | Treatment (T) | 1 | 0.0177 | 0.8952 |
|  |  |  |  | **Family (F)** | **20** | **9.961979** | **0.0105** |
|  |  |  |  | T✕F | 20 | 0.6321 | 0.8526 |
| Longest leaf width (cm) | 63 | 10.41 ± 0.88 | 10.55 ± 1.34 | Treatment (T) | 1 | 0.0016 | 0.9687 |
|  |  |  |  | **Family (F)** | **20** | **0.602364** | **0.0152** |
|  |  |  |  | **T✕F** | **20** | **3.3143** | **0.0023** |
| No. of leaves | 63 | 12.06 ± 2.35 | 11.58 ± 1.96 | Treatment (T) | 1 | 1.1356 | 0.2959 |
|  |  |  |  | **Family (F)** | **20** | **3.023188** | **0.0163** |
|  |  |  |  | T✕F | 20 | 0.5236 | 0.9306 |
| Benzaldehyde | 63 | 1113.67 ± 669.87 | 1194.23 ± 876.97 | Treatment (T) | 1 | 0.1029 | 0.7505 |
| Target ion: 105 | Q1: 106.1; Q2: 77.05; Q3: 51 | 876.97 ± 527.49 | 940.41 ± 690.58 | Family (F) | 20 | -0.00037 | 0.9603 |
|  |  |  |  | T✕F | 20 | 0.8174 | 0.677 |
| 1-Butene-4-isothyocyanate | 63 | 351.4 ± 299.78 | 475.79 ± 429.66 | Treatment (T) | 1 | 1.1043 | 0.3033 |
| Target ion: 72 | Q1: 113; Q2: 39.05; Q3: 55.05 | 276.72 ± 236.07 | 374.66 ± 338.34 | Family (F) | 20 | 0.02993 | 0.2637 |
|  |  |  |  | T✕F | 20 | 0.9647 | 0.5269 |
| 6-Methyl-5-hepten-2-one | 63 | 4.72 ± 6.01 | 3.57 ± 5.41 | Treatment (T) | 1 | 0.7608 | 0.3907 |
| Target ion: 43 | Q1: 108.05; Q2: 41.05; Q3: 69.1 | 3.72 ± 4.74 | 2.81 ± 4.26 | Family (F) | 20 | 0.049251 | 0.1591 |
|  |  |  |  | T✕F | 20 | 1.4061 | 0.2015 |
| Z-3-Hexenyl acetate | 63 | 797.8 ± 636.08 | 733.43 ± 638.14 | Treatment (T) | 1 | 0.2605 | 0.614 |
| Target ion: 67.05 | Q1: 43; Q2: 82.1; Q3: 41.05 | 628.24 ± 500.89 | 577.55 ± 502.51 | **Family (F)** | **20** | **0.084289** | **0.0107** |
|  |  |  |  | T✕F | 20 | 1.3261 | 0.2451 |
| Phenylacetaldehyde | 63 | 3255.02 ± 4509.64 | 2513.72 ± 4023.6 | Treatment (T) | 1 | 0.9227 | 0.3448 |
| Target ion: 91.1 | Q1: 92.05; Q2: 120; Q3: 65 | 2563.2 ± 3551.16 | 1979.45 ± 3168.43 | Family (F) | 20 | 0.246071 | 0.0705 |
|  |  |  |  | T✕F | 20 | 0.4653 | 0.9602 |
| Methyl benzoate | 63 | 4.06 ± 4.25 | 4.46 ± 4.78 | Treatment (T) | 1 | 0.0093 | 0.924 |
| Target ion: 105 | Q1: 77.05; Q2: 136.05; Q3: 51 | 3.2 ± 3.35 | 3.52 ± 3.76 | **Family (F)** | **20** | **0.108672** | **0.0117** |
|  |  |  |  | T✕F | 20 | 1.2703 | 0.2756 |
| Benzyl nitrile | 63 | 106.29 ± 157.3 | 89.39 ± 140.99 | Treatment (T) | 1 | 0.1027 | 0.751 |
| Target ion: 117.1 | Q1: 116; Q2: 90.1; Q3: 89.1 | 83.7 ± 123.87 | 70.39 ± 111.03 | **Family (F)** | **20** | **0.220402** | **0.0175** |
|  |  |  |  | **T✕F** | **20** | **2.0231** | **0.0425** |
| Methyl salicylate | 63 | 121.82 ± 138.75 | 98.66 ± 67.6 | Treatment (T) | 1 | 0.024 | 0.8779 |
| Target ion: 120 | Q1: 92; Q2: 152; Q3: 121 | 95.93 ± 109.26 | 77.69 ± 53.24 | **Family (F)** | **20** | **0.0607** | **0.0355** |
|  |  |  |  | T✕F | 20 | 0.4525 | 0.9647 |
| 2-Aminobenzaldehyde | 63 | 564.4 ± 953.01 | 416.16 ± 820.09 | Treatment (T) | 1 | 0.659 | 0.4238 |
| Target ion: 93.1 | Q1: 120.95; Q2: 66; Q3: 64.95 | 444.45 ± 750.46 | 327.71 ± 645.79 | **Family (F)** | **20** | **0.560854** | **0.0096** |
|  |  |  |  | T✕F | 20 | 0.6015 | 0.8786 |
| p-anisaldehyde | 63 | 402.71 ± 358.32 | 452.67 ± 402.54 | Treatment (T) | 1 | 0.1439 | 0.7074 |
| Target ion: 135 | Q1: 136; Q2: 76.95; Q3: 92 | 317.11 ± 282.17 | 356.46 ± 316.98 | Family (F) | 20 | 0.013902 | 0.3093 |
|  |  |  |  | T✕F | 20 | 1.195 | 0.3283 |
| Indole | 63 | 131.34 ± 210.05 | 110.2 ± 160.69 | Treatment (T) | 1 | 0.0029 | 0.9572 |
| Target ion: 117.1 | Q1: 90.1; Q2: 89.1; Q3: 62.95 | 103.43 ± 165.41 | 86.78 ± 126.53 | **Family (F)** | **20** | **0.476759** | **0.0076** |
|  |  |  |  | T✕F | 20 | 0.9153 | 0.5747 |
| Methyl anthranilate | 63 | 50.65 ± 70.5 | 39.78 ± 61.67 | Treatment (T) | 1 | 0.3715 | 0.5471 |
| Target ion: 118.95 | Q1: 151.05; Q2: 92; Q3: 120 | 39.89 ± 55.52 | 31.32 ± 48.56 | **Family (F)** | **20** | **0.235397** | **0.0274** |
|  |  |  |  | T✕F | 20 | 0.7188 | 0.7753 |
| (*E,E*)-α-Farnesene | 63 | 4445.23 ± 1782.39 | 4462.27 ± 2098.95 | Treatment (T) | 1 | 0.1755 | 0.6784 |
| Target ion: 93.05 | Q1: 107.1; Q2: 41.05; Q3: 119.1 | 3500.44 ± 1403.56 | 3513.86 ± 1652.84 | Family (F) | 20 | 0.012289 | 0.0998 |
|  |  |  |  | T✕F | 20 | 0.5898 | 0.8884 |
| Total VOCs | 63 | 11349.13 ± 7781.8 | 10594.33 ± 5993.84 | Treatment (T) | 1 | 0.1328 | 0.7186 |
|  |  | 8936.99 ± 6127.86 | 8342.62 ± 4719.91 | Family (F) | 20 | 0.0722 | 0.175 |
|  |  |  |  | T✕F | 20 | 0.6447 | 0.8349 |
| No. of bees per 5 min | 84 | 6.95 ± 3.80 | 7.42 ± 3.90 | Treatment (T) | 1 | 0.182 | 0.684 |
|  |  |  |  | Plot (P) | 6 | 0.0106 | 0.369 |
|  |  |  |  |  |  |  |  |

**Table S2.** Insects observed interacting with *Brassica rapa* plants in the field during the experiment. Herbivores were only present in the plots with plants not treated with pesticide

| Insect group | Order | Identity |
| --- | --- | --- |
| Pollinators | Hymenoptera | *Apis mellifera* (honeybee) |
|  |  | *Bombus spp*. (at least three species) |
|  |  | Solitary bees (at least 4 species of medium and small size) |
|  | Diptera | *Episyrphus* spp. (hoverfly) |
|  |  | Other Syrphids |
|  | Lepidoptera | *Pieris brassicae*. (white cabbage butterfly) |
| Herbivores | Coleoptera | *Brassicogethes viridescens* (pollen beetle) |
|  |  | *Phyllotreta cruciferae* and *P. striolata* (flea beetles) |
|  |  | *Ceutorhynchus obstrictus* (cabbage seedpod weevil) |
|  | Lepidoptera | *Pieris brassicae*. (white cabbage butterfly) |
|  |  | *Plutella xylostella* (diamondback moth) |
|  | Hemiptera | Sapsuckers(aphids) |
|  | Mollusca | *Arion rufus* |
| Predators | Coleoptera | *Coccinella* spp. (ladybugs, adults and larvae) |
|  | Hymenoptera | Parasitoid wasps (adults) |

**Table S3.** Comparisons of plants of the two selection treatments at generation five to test for evolutionary changes in all plant traits inspected. Sample size (*N*) and mean ± S.D. per trait per treatment is shown. For statistical analyses, linear mixed models with ‘treatment’ and ‘treatment✕plot-hill’ as fixed factors, and ‘plot-hill’ as random factors were performed. *P*-values in bold indicate a significant effect in the models. For the random factor ‘plot-hill’, the variance component is provided instead of the *F* value. All trait means are expressed in mm if not otherwise indicated. Scent variables are in units of pg/flower/L, and underlined for units of pg/flower/6.667 min. For scent compounds, the target ion and the ions for identifying spectra (Q1, Q2, and Q3 below the sample size data) are provided.

| Trait | *N* | Plants without pesticide | Plants with pesticide | Source | df | *F* or variance component | *P* |
| --- | --- | --- | --- | --- | --- | --- | --- |
| FLORAL MORPHOLOGY | |  |  |  |  |  |  |
| Petal length | 253 | 8.06 ± 0.652 | 8.002 ± 0.657 | Treatment (T) | 1 | 0.405 | 0.525 |
|  |  |  |  | Plot-hill (PH) | 3 | -4.72E-05 | 0.993 |
|  |  |  |  | T✕PH | 3 | 2.169 | 0.092 |
| Petal width | 253 | 5.8 ± 0.705 | 5.847 ± 0.708 | Treatment (T) | 1 | 0.355 | 0.552 |
|  |  |  |  | Plot-hill (PH) | 3 | 0.117 | 0.246 |
|  |  |  |  | T✕PH | 3 | 4.704 | **0.003** |
| Pistil | 253 | 10.63 ± 1.058 | 10.83 ± 0.997 | Treatment (T) | 1 | 2.429 | 0.12 |
|  |  |  |  | Plot-hill (PH) | 3 | 0.034 | 0.41 |
|  |  |  |  | T✕PH | 3 | 2.165 | 0.093 |
| Long stamen | 253 | 9.148 ± 0.685 | 9.331 ± 0.706 | Treatment (T) | 1 | 3.575 | 0.257 |
|  |  |  |  | Plot-hill (PH) | 3 | 0.028 | **0.002** |
|  |  |  |  | T✕PH | 3 | 1.852 | 0.153 |
| Short stamen | 253 | 5.782 ± 0.526 | 5.87 ± 0.522 | Treatment (T) | 1 | 1.907 | 0.169 |
|  |  |  |  | Plot-hill (PH) | 3 | 6.27E-05 | 0.986 |
|  |  |  |  | T✕PH | 3 | 2.505 | 0.06 |
| Herkogamy | 253 | 1.487 ± 1.088 | 1.494 ± 0.91 | Treatment (T) | 1 | 0.008 | 0.93 |
|  |  |  |  | Plot-hill (PH) | 3 | 0.006 | 0.731 |
|  |  |  |  | T✕PH | 3 | 2.459 | 0.063 |
| Nectar volume (µl) | 253 | 5.642 ± 3.68 | 4.989 ± 4.474 | Treatment (T) | 1 | 1.36 | 0.327 |
|  |  |  |  | Plot-hill (PH) | 3 | 0.006 | 0.307 |
|  |  |  |  | T✕PH | 3 | 0.785 | 0.575 |
| Plant height (cm) | 251 | 103.76 ± 13.45 | 101.23 ± 11.481 | Treatment (T) | 1 | 2.818 | 0.095 |
|  |  |  |  | Plot-hill (PH) | 3 | 11.674 | 0.309 |
|  |  |  |  | T✕PH | 3 | 4.074 | **0.008** |
| FLORAL VOLATILES |  |  |  |  |  |  |  |
| Benzaldehyde | 240 | 455.35 ± 480.83 | 608.83 ± 539.04 | Treatment (T) | 1 | 6.969 | **0.009** |
| Target ion: 105 | Q1: 106.1; Q2: 77.05; Q3: 51 | 358.78 ± 390.32 | 477.82 ± 425.39 | Plot-hill (PH) | 3 | 8.04E-04 | 0.788 |
|  |  |  |  | T✕PH | 3 | 5.203 | **0.002** |
| 1-Butene-4-isothyocyanate | 240 | 71.307 ± 130.01 | 75.782 ± 135.23 | Treatment (T) | 1 | 0.083 | 0.774 |
| Target ion: 72 | Q1: 113; Q2: 39.05; Q3: 55.05 | 55.56 ± 102.32 | 59.99 ± 108.25 | Plot-hill (PH) | 3 | -0.002 | 0.219 |
|  |  |  |  | T✕PH | 3 | 1.997 | 0.115 |
| 6-Methyl-5-hepten-2-one | 240 | 11.99 ± 6.269 | 11.88 ± 5.758 | Treatment (T) | 1 | 0.061 | 0.805 |
| Target ion: 43 | Q1: 108.05; Q2: 41.05; Q3: 69.1 | 9.4 ± 5.05 | 9.32 ± 4.62 | Plot-hill (PH) | 3 | 1.75E-05 | 0.978 |
|  |  |  |  | T✕PH | 3 | 0.717 | 0.543 |
| Z-3-Hexenyl acetate | 240 | 191.16 ± 202.9 | 183.82 ± 177.64 | Treatment (T) | 1 | 0.042 | 0.839 |
| Target ion: 67.05 | Q1: 43; Q2: 82.1; Q3: 41.05 | 149.08 ± 161.98 | 143.79 ± 139.31 | Plot-hill (PH) | 3 | 0.005 | 0.448 |
|  |  |  |  | T✕PH | 3 | 0.413 | 0.744 |
| Phenylacetaldehyde | 240 | 4185.2 ± 4040.9 | 5024.9 ± 3673.7 | Treatment (T) | 1 | 4.777 | **0.03** |
| Target ion: 91.1 | Q1: 92.05; Q2: 120; Q3: 65 | 3277.19 ± 3238.77 | 3925.73 ± 2879.09 | Plot-hill (PH) | 3 | 0.009 | 0.485 |
|  |  |  |  | T✕PH | 3 | 2.714 | **0.046** |
| Methyl benzoate | 240 | 77.448 ± 86.053 | 103.47 ± 111.95 | Treatment (T) | 1 | 6.706 | **0.01** |
| Target ion: 105 | Q1: 77.05; Q2: 136.05; Q3: 51 | 60.93 ± 69.87 | 80.31 ± 83.73 | Plot-hill (PH) | 3 | 1.18E-05 | 0.995 |
|  |  |  |  | T✕PH | 3 | 1.147 | 0.331 |
| Benzyl nitrile | 240 | 107.08 ± 143.48 | 120.87 ± 130.17 | Treatment (T) | 1 | 3.9 | **0.049** |
| Target ion: 117.1 | Q1: 116; Q2: 90.1; Q3: 89.1 | 84.51 ± 117.04 | 94.53 ± 101.6 | Plot-hill (PH) | 3 | 0.008 | 0.417 |
|  |  |  |  | T✕PH | 3 | 10.43 | **<.0001** |
| Methyl salicylate | 240 | 23.628 ± 19.402 | 22.698 ± 19.673 | Treatment (T) | 1 | 0.262 | 0.609 |
| Target ion: 120 | Q1: 92; Q2: 152; Q3: 121 | 18.43 ± 15.35 | 17.72 ± 15.03 | Plot-hill (PH) | 3 | 2.70E-04 | 0.898 |
|  |  |  |  | T✕PH | 3 | 0.419 | 0.74 |
| 2-Aminobenzaldehyde | 240 | 293.63 ± 342.19 | 331.55 ± 338.22 | Treatment (T) | 1 | 1.906 | 0.169 |
| Target ion: 93.1 | Q1: 120.95; Q2: 66; Q3: 64.95 | 231.04 ± 277.03 | 258.34 ± 261.83 | Plot-hill (PH) | 3 | 0.007 | 0.512 |
|  |  |  |  | T✕PH | 3 | 5.39 | 0.2 |
| p-anisaldehyde | 240 | 106.88 ± 116.73 | 159.99 ± 144.8 | Treatment (T) | 1 | 18.3 | **<.0001** |
| Target ion: 135 | Q1: 136; Q2: 76.95; Q3: 92 | 84.47 ± 96.61 | 125.19 ± 113.22 | Plot-hill (PH) | 3 | 4.11E-04 | 0.861 |
|  |  |  |  | T✕PH | 3 | 6.383 | **<0.001** |
| Indole | 240 | 93.212 ± 115.47 | 90.316 ± 80.039 | Treatment (T) | 1 | 0.356 | 0.551 |
| Target ion: 117.1 | Q1: 90.1; Q2: 89.1; Q3: 62.95 | 73.36 ± 94.48 | 70.28 ± 61.51 | Plot-hill (PH) | 3 | 1.66E-05 | 0.996 |
|  |  |  |  | T✕PH | 3 | 2.334 | 0.075 |
| Methyl anthranilate | 240 | 17.021 ± 20.772 | 20.035 ± 23.001 | Treatment (T) | 1 | 2.091 | 0.15 |
| Target ion: 118.95 | Q1: 151.05; Q2: 92; Q3: 120 | 13.34 ± 16.44 | 15.71 ± 18.27 | Plot-hill (PH) | 3 | 0.007 | 0.378 |
|  |  |  |  | T✕PH | 3 | 12.7 | 0.872 |
| (*E,E*)-α-Farnesene | 240 | 1009.8 ± 655.36 | 844.89 ± 547.36 | Treatment (T) | 1 | 2.857 | 0.092 |
| Target ion: 93.05 | Q1: 107.1; Q2: 41.05; Q3: 119.1 | 789.19 ± 518.26 | 656.46 ± 411.52 | Plot-hill (PH) | 3 | 0.012 | 0.337 |
|  |  |  |  | T✕PH | 3 | 4.478 | **0.005** |
| Total VOCs | 240 | 6643.7 ± 5200.7 | 7599 ± 4590.7 | Treatment (T) | 1 | 3.578 | 0.06 |
|  |  | 5225.27 ± 4191.8 | 5935.2 ± 3592.66 | Plot-hill (PH) | 3 | 0.363 | 0.463 |
|  |  |  |  | T✕PH | 3 | 4.134 | **0.004** |

**Table S4.** Pearson correlation coefficients between floral traits by selection treatment in plants of generation 5. The shadowed area indicates the correlations between floral morphology and floral volatile compounds

| Selection treatment | Trait | Pw | Pt | Ls | Ss | Ne | He | BZ | ISO | MHO | Z3 | PAA | MB | BN | MS | AM | ANI | IND | MAN | FAR |
| --- | --- | --- | --- | --- | --- | --- | --- | --- | --- | --- | --- | --- | --- | --- | --- | --- | --- | --- | --- | --- |
| Without pesticide | Petal length | 0.58 | 0.37 | 0.37 | 0.31 | 0.03 | -0.01 | 0.00 | -0.13 | -0.07 | -0.10 | 0.07 | -0.16 | 0.16 | 0.03 | 0.07 | 0.08 | 0.09 | 0.03 | -0.04 |
|  | Pw, Petal width |  | 0.18 | 0.37 | 0.33 | -0.02 | -0.03 | 0.09 | -0.03 | 0.02 | 0.04 | 0.14 | -0.08 | 0.09 | -0.07 | 0.13 | 0.07 | 0.14 | 0.14 | 0.10 |
|  | Pt, Pistil length |  |  | 0.25 | 0.24 | 0.22 | -0.13 | 0.03 | -0.08 | 0.07 | -0.16 | -0.01 | -0.10 | 0.07 | 0.05 | 0.05 | 0.21 | 0.05 | 0.05 | 0.00 |
|  | Ls, Long stamen |  |  |  | 0.71 | 0.14 | -0.14 | 0.20 | 0.07 | -0.03 | 0.08 | 0.19 | 0.01 | 0.24 | 0.12 | 0.30 | 0.16 | 0.31 | 0.33 | 0.03 |
|  | Ss, Short stamen |  |  |  |  | 0.10 | -0.18 | 0.22 | 0.06 | 0.01 | 0.09 | 0.14 | 0.05 | 0.22 | 0.22 | 0.27 | 0.20 | 0.31 | 0.29 | 0.13 |
|  | Ne, Nectar volume |  |  |  |  |  | -0.09 | 0.27 | 0.02 | 0.12 | 0.00 | 0.04 | 0.15 | -0.06 | 0.01 | 0.01 | 0.14 | -0.02 | 0.08 | 0.17 |
|  | He, Plant height |  |  |  |  |  |  | -0.13 | -0.20 | -0.08 | -0.10 | -0.08 | 0.04 | -0.28 | -0.33 | -0.25 | -0.25 | -0.28 | -0.32 | -0.15 |
|  | BZ, Benzaldehyde |  |  |  |  |  |  |  | 0.08 | 0.31 | 0.26 | 0.51 | 0.55 | 0.48 | 0.39 | 0.40 | 0.78 | 0.50 | 0.29 | 0.60 |
|  | ISO, 1-Butene-4-isothyocyanate |  |  |  |  |  |  |  |  | 0.19 | 0.55 | 0.09 | 0.06 | 0.22 | 0.18 | 0.05 | 0.11 | 0.12 | 0.06 | 0.10 |
|  | MHO, 6-Methyl-5-hepten-2-one |  |  |  |  |  |  |  |  |  | 0.13 | 0.12 | 0.30 | 0.35 | 0.31 | 0.22 | 0.27 | 0.18 | 0.26 | 0.40 |
|  | Z3, Z-3-Hexenyl acetate |  |  |  |  |  |  |  |  |  |  | 0.23 | 0.25 | 0.27 | 0.24 | 0.25 | 0.28 | 0.31 | 0.18 | 0.18 |
|  | PAA, Phenylacetaldehyde |  |  |  |  |  |  |  |  |  |  |  | 0.24 | 0.41 | 0.30 | 0.50 | 0.40 | 0.63 | 0.17 | 0.48 |
|  | MB, Methyl benzoate |  |  |  |  |  |  |  |  |  |  |  |  | 0.27 | 0.53 | 0.28 | 0.34 | 0.29 | 0.35 | 0.34 |
|  | BN, Benzyl nitrile |  |  |  |  |  |  |  |  |  |  |  |  |  | 0.46 | 0.49 | 0.54 | 0.64 | 0.40 | 0.33 |
|  | MS, Methyl salicylate |  |  |  |  |  |  |  |  |  |  |  |  |  |  | 0.42 | 0.50 | 0.52 | 0.50 | 0.31 |
|  | AM, 2-Aminobenzaldehyde |  |  |  |  |  |  |  |  |  |  |  |  |  |  |  | 0.48 | 0.86 | 0.73 | 0.23 |
|  | ANI, p-anisaldehyde |  |  |  |  |  |  |  |  |  |  |  |  |  |  |  |  | 0.63 | 0.40 | 0.47 |
|  | IND, Indole |  |  |  |  |  |  |  |  |  |  |  |  |  |  |  |  |  | 0.62 | 0.34 |
|  | MAN, Methyl anthranilate |  |  |  |  |  |  |  |  |  |  |  |  |  |  |  |  |  |  | 0.15 |
|  | FAR, (*E,E*)-α-Farnesene |  |  |  |  |  |  |  |  |  |  |  |  |  |  |  |  |  |  |  |
| With pesticide | Petal length | 0.52 | 0.21 | 0.24 | 0.16 | 0.07 | 0.01 | -0.02 | 0.00 | -0.07 | -0.06 | 0.05 | -0.14 | 0.07 | -0.24 | -0.05 | -0.11 | -0.12 | -0.14 | -0.02 |
|  | Pw, Petal width |  | 0.05 | 0.09 | 0.02 | -0.05 | -0.05 | 0.09 | 0.14 | 0.00 | 0.00 | 0.26 | -0.12 | 0.31 | -0.16 | 0.16 | 0.08 | 0.06 | -0.02 | 0.07 |
|  | Pt, Pistil length |  |  | 0.47 | 0.42 | 0.26 | 0.22 | 0.12 | -0.14 | -0.06 | -0.01 | 0.07 | -0.01 | 0.00 | -0.06 | 0.02 | 0.01 | 0.00 | -0.21 | 0.14 |
|  | Ls, Long stamen |  |  |  | 0.64 | 0.40 | 0.20 | 0.28 | -0.18 | 0.01 | 0.10 | 0.17 | 0.07 | 0.07 | 0.00 | 0.14 | -0.02 | 0.12 | -0.15 | 0.16 |
|  | Ss, Short stamen |  |  |  |  | 0.28 | 0.02 | 0.26 | -0.10 | 0.08 | 0.08 | 0.11 | 0.15 | 0.08 | 0.11 | 0.13 | 0.09 | 0.20 | -0.02 | 0.01 |
|  | Ne, Nectar volume |  |  |  |  |  | 0.05 | 0.21 | -0.26 | 0.05 | 0.00 | 0.17 | 0.03 | -0.03 | -0.05 | 0.15 | 0.03 | 0.04 | 0.03 | 0.04 |
|  | He, Plant height |  |  |  |  |  |  | -0.17 | 0.07 | -0.20 | 0.06 | -0.16 | -0.11 | -0.17 | -0.23 | -0.17 | -0.23 | -0.12 | -0.23 | -0.11 |
|  | BZ, Benzaldehyde |  |  |  |  |  |  |  | 0.09 | 0.24 | 0.14 | 0.61 | 0.46 | 0.52 | 0.36 | 0.55 | 0.67 | 0.55 | 0.14 | 0.43 |
|  | ISO, 1-Butene-4-isothyocyanate |  |  |  |  |  |  |  |  | 0.10 | 0.52 | 0.10 | 0.11 | 0.11 | 0.09 | 0.08 | 0.11 | 0.03 | 0.04 | -0.04 |
|  | MHO, 6-Methyl-5-hepten-2-one |  |  |  |  |  |  |  |  |  | 0.14 | 0.17 | 0.24 | 0.21 | 0.31 | 0.21 | 0.28 | 0.16 | 0.13 | 0.26 |
|  | Z3, Z-3-Hexenyl acetate |  |  |  |  |  |  |  |  |  |  | 0.24 | 0.19 | 0.16 | 0.17 | 0.19 | -0.02 | 0.15 | 0.10 | 0.05 |
|  | PAA, Phenylacetaldehyde |  |  |  |  |  |  |  |  |  |  |  | 0.34 | 0.78 | 0.32 | 0.78 | 0.39 | 0.78 | 0.36 | 0.34 |
|  | MB, Methyl benzoate |  |  |  |  |  |  |  |  |  |  |  |  | 0.20 | 0.74 | 0.30 | 0.35 | 0.37 | 0.44 | 0.26 |
|  | BN, Benzyl nitrile |  |  |  |  |  |  |  |  |  |  |  |  |  | 0.25 | 0.71 | 0.49 | 0.77 | 0.39 | 0.49 |
|  | MS, Methyl salicylate |  |  |  |  |  |  |  |  |  |  |  |  |  |  | 0.20 | 0.24 | 0.34 | 0.29 | 0.30 |
|  | AM, 2-Aminobenzaldehyde |  |  |  |  |  |  |  |  |  |  |  |  |  |  |  | 0.53 | 0.83 | 0.61 | 0.39 |
|  | ANI, p-anisaldehyde |  |  |  |  |  |  |  |  |  |  |  |  |  |  |  |  | 0.53 | 0.37 | 0.30 |
|  | IND, Indole |  |  |  |  |  |  |  |  |  |  |  |  |  |  |  |  |  | 0.52 | 0.41 |
|  | MAN, Methyl anthranilate |  |  |  |  |  |  |  |  |  |  |  |  |  |  |  |  |  |  | 0.21 |
|  | FAR, (*E,E*)-α-Farnesene |  |  |  |  |  |  |  |  |  |  |  |  |  |  |  |  |  |  |  |
